# Supplementary material
Source: PubMed Central journal article supplement (PMC3121236)
Supplement: a-67-00319-sup3.pdf [file a-67-00319-sup3.pdf]

**THE DEVELOPMENT OF LAUE TECHNIQUES FOR SINGLE PULSE DIFFRACTION OF  
CHEMICAL COMPLEXES: TIME-RESOLVED LAUE DIFFRACTION ON A BINUCLEAR-  
RHODIUM ORGANOMETALLIC COMPLEX.**

Anna. Makal, Elzbieta Trzop, Jesse Sokolow, Jaroslaw Kalinowski, Jason Benedict and Philip Coppens  
Chemistry Department, University at Buffalo, State University of New York, Buffalo, NY 14260-3000.

**Supplementary Material**

Table S1. Number of reflections before and after averaging, cut-off and  $R_{\text{merge}}$  values for individual data sets.

| Data set | # reflections recorded | # reflections after averaging over 10 frame-sequence | # reflections after merging over equivalents | $\sin \theta/\lambda$ max [ $\text{\AA}^{-1}$ ] | $R_{\text{merge}}$ |
|----------|------------------------|------------------------------------------------------|----------------------------------------------|-------------------------------------------------|--------------------|
| 19       | 30069                  | 3380                                                 | 1196                                         | 0.40                                            | 0.0196             |
| 20       | 15489                  | 1844                                                 | 588                                          | 0.40                                            | 0.0204             |
| 24       | 14464                  | 1719                                                 | 540                                          | 0.38                                            | 0.0274             |
| 27       | 27675                  | 3439                                                 | 760                                          | 0.51                                            | 0.0237             |
| 28       | 42288                  | 5386                                                 | 1281                                         | 0.41                                            | 0.0214             |
| 29       | 37112                  | 4778                                                 | 1150                                         | 0.42                                            | 0.0175             |

Table S2. Details on the filtering of the measurements.

| Data set | % $I/\sigma(I) > 3.0$ for both ON and OFF frames | % $I/\sigma(I) > 10.0$ for both ON and OFF frames | % Reflections measured on all 10 repeated frames | $\sigma(R) < 0.5$ |
|----------|--------------------------------------------------|---------------------------------------------------|--------------------------------------------------|-------------------|
| 19       | 94.9                                             | 62.8                                              | 79.4                                             | 89.0              |
| 20       | 93.3                                             | 52.9                                              | 71.4                                             | 92.7              |
| 24       | 93.4                                             | 57.4                                              | 70.0                                             | 91.7              |
| 27       | 91.0                                             | 48.2                                              | 64.5                                             | 86.9              |
| 28       | 93.7                                             | 58.1                                              | 63.1                                             | 87.1              |
| 29       | 94.4                                             | 59.8                                              | 63.5                                             | 87.2              |

Table S3. Final refined values of excited-state occupancies and  $k_B$  parameters for each of six datasets.

| Data set | Laser power (mJ/mm <sup>2</sup> ) | occupancy | $k_B$    |
|----------|-----------------------------------|-----------|----------|
| 19       | 0.60                              | 0.059(3)  | 1.141(3) |
| 20       | 0.60                              | 0.103(6)  | 1.252(3) |

|    |      |          |          |
|----|------|----------|----------|
| 24 | 0.55 | 0.081(7) | 1.299(7) |
| 27 | 0.45 | 0.058(6) | 1.142(6) |
| 28 | 0.45 | 0.052(4) | 1.112(4) |
| 29 | 0.45 | 0.058(3) | 1.091(3) |

Table S4. Final coordinates of the excited-state rhodium atoms.

| atom | x         | y         | z         |
|------|-----------|-----------|-----------|
| Rh1E | 0.6437(4) | 0.2804(3) | 0.1953(2) |
| Rh2E | 0.8056(4) | 0.2525(3) | 0.1270(2) |

Table S5. List of non-hydrogen atoms belonging to each of the rigid PNP ligands.

|    |                                                         |
|----|---------------------------------------------------------|
| #1 | P1, P2, N1, O1, O2, O3, O4, C1, C2, C3, C4, C5          |
| #2 | P3, P4, N2, O5, O6, O7, O8, C6, C7, C8, C9, C10         |
| #3 | P7, P8, N4, O13, O14, O15, O16, C16, C17, C18, C19, C20 |
| #4 | P5, P6, N3, O9, O10, O11, O12, C11, C12, C13, C14, C15  |

Table S6. Final coordinates of the anchor points of the four rigid PNP ligands.

| anchor | initial |        |        | final      |            |            |
|--------|---------|--------|--------|------------|------------|------------|
|        | x       | y      | z      | x          | y          | z          |
| #1     | 0.7300  | 0.2690 | 0.1610 | 0.7312(15) | 0.2664(10) | 0.1581(11) |
| #2     | 0.7300  | 0.2690 | 0.1610 | 0.7181(15) | 0.2665(14) | 0.1629(5)  |
| #3     | 0.6462  | 0.2870 | 0.1959 | 0.6436(19) | 0.2848(9)  | 0.1950(4)  |
| #4     | 0.8146  | 0.2519 | 0.1254 | 0.8084(13) | 0.2524(10) | 0.1273(8)  |

Table S7. Eulerian rotation angles  $\varphi$ ,  $\chi$ ,  $\psi$  ( $^\circ$ ), of the four PNP rigid bodies.

|    | angle     |         |        |
|----|-----------|---------|--------|
|    | $\varphi$ | $\chi$  | $\psi$ |
| #1 | 0.3(4)    | 2.5(3)  | 1.0(7) |
| #2 | 0.8(6)    | -1.3(3) | 0.3(5) |
| #3 | -2.6(4)   | 1.8(7)  | 0.7(3) |
| #4 | 0.9(5)    | -0.1(5) | 0.9(4) |

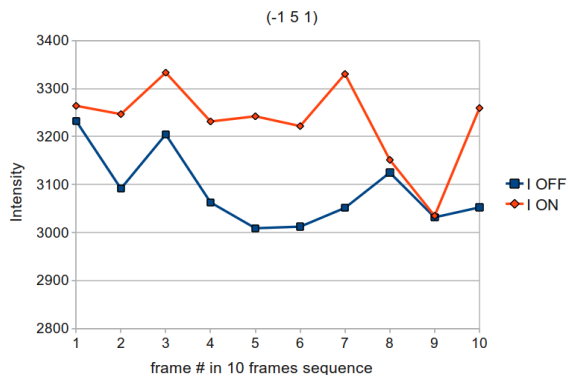

Fig. S1.

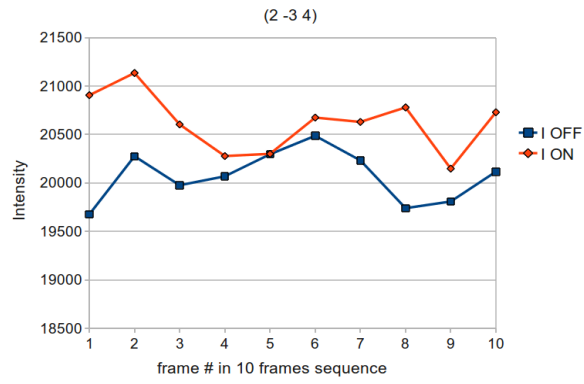

Intensities of 10 repeated measurements for two reflections with  $I_{ON} > I_{OFF}$  from data set 29.
